# Supplementary material for: Loading quantum dots into thermo-responsive microgels by reversible transfer from organic solvents to water
Source: Royal Society of Chemistry journal article supplement (doi:10.1039/b713253k), 2008-01-01
Supplement: b713253k.pdf [file b713253k.pdf]

## Supplementary Data

### **Loading Nanoparticles into Thermo-responsive Microgels by Reversible Transfer from Organic Solvents to Water**

Lei Shen,<sup>a,b</sup> Andrij Pich,<sup>a,c</sup> Daniele Fava,<sup>a</sup> Mingfeng Wang,<sup>a</sup> Sandeep Kumar,<sup>a</sup> Chi Wu,<sup>b,d</sup> Gregory  
D. Scholes,<sup>\*,a</sup> and Mitchell A. Winnik<sup>\*,a</sup>

*a. Department of Chemistry, University of Toronto, 80 St. George Street, Toronto, M5S 3H6  
Ontario Canada;*

*b. The Hefei National Laboratory for Physical Sciences at Microscale, Department of Chemical  
Physics, University of Science and Technology of China, Hefei 230026, Anhui, China;*

*c. Department of Macromolecular Chemistry and Textile Chemistry, Technische Universität  
Dresden, 01062 Dresden, Germany;*

*d. Department of Chemistry, The Chinese University of Hong Kong, Shatin, N. T., Hong Kong.*

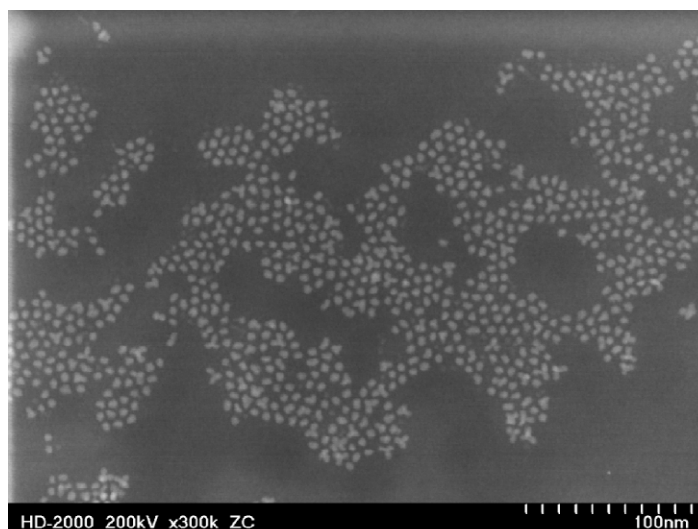

**Supporting 1.** TEM image of the CdSe/TOPO QDs with a band-edge absorption at 588 nm and a mean core diameter of  $4.5 \pm 0.3$  nm as determined by TEM.

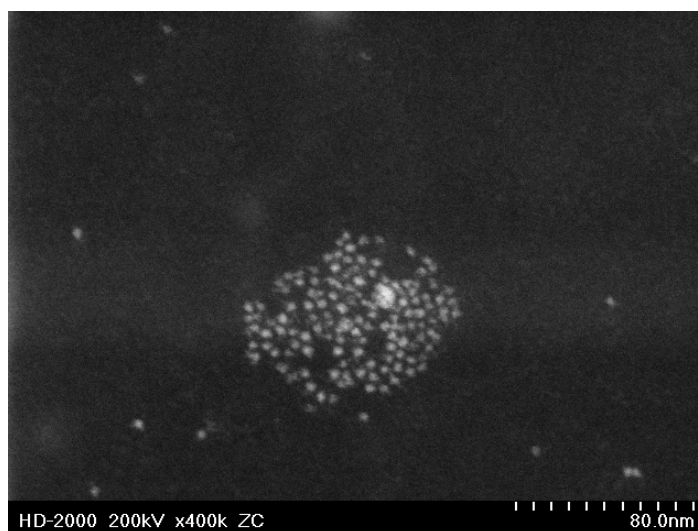

**Supporting 2.** TEM image of the PbS/OA QDs with a band-edge absorption at 1108 nm and a mean core diameter of  $3.5 \pm 0.5$  nm as determined by TEM.
